# Supplementary material
Source: PubMed Central journal article supplement (PMC3587709)
Supplement: cr2012178x3.pdf [file cr2012178x3.pdf]

Supplementary information, Figure S3

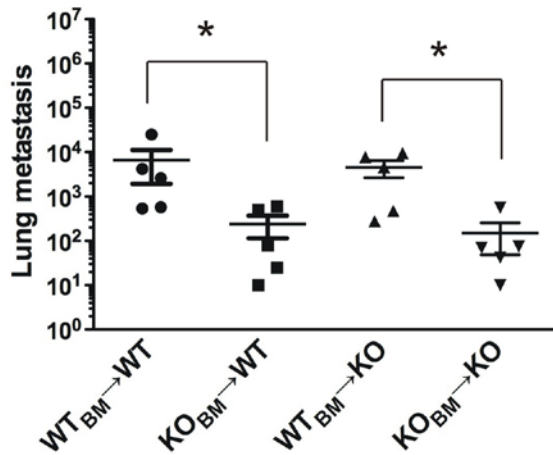

**Figure S3** Lung metastasis of bone marrow chimerism. Lethally irradiated female WT and KO mice were transplanted with male WT and KO bone marrows. Thirty days after bone marrow reconstitution, the recipients were inoculated with 4T1 cells and lung metastasis of 4T1 tumor cells was measured by the 6-thioguanine clonogenicity assay.  $n = 5$  mice per group. Data are represented as mean  $\pm$  SE.  $*P < 0.05$ .
