# Supplementary material
Source: PubMed Central journal article supplement (PMC3587709)
Supplement: cr2012178x7.pdf [file cr2012178x7.pdf]

## Supplementary information, Figure S7

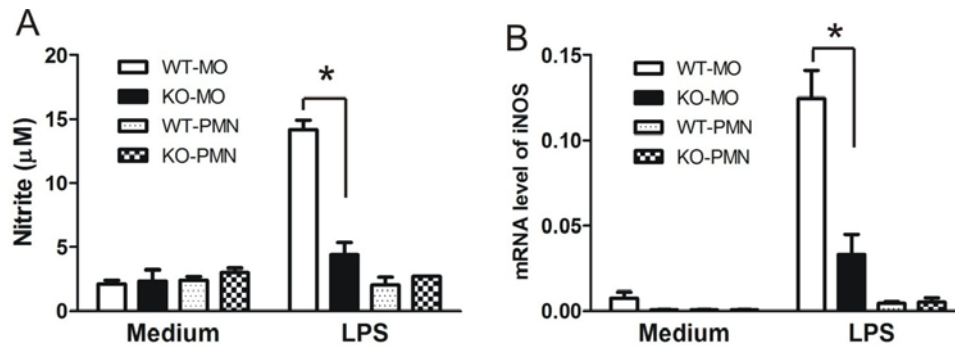

**Figure S7** Production of NO and relative mRNA expression level of iNOS in different MDSC subsets. **(A)** Purified MDSC subsets were stimulated with or without 1  $\mu\text{g}/\text{ml}$  LPS for 24 h, and supernatants were collected for measurement of nitrite. Nitrite concentrations were determined by a standard Greiss Reaction, as described previously [1]. **(B)** The subsets described in **A** were characterized by real-time PCR for expression of iNOS. GAPDH mRNA was analyzed as an internal control. The experiment shown is representative of two independent experiments. \* $P < 0.05$ .

## Reference

- 1 Youn JI, Nagaraj S, Collazo M, Gabrilovich DI. Subsets of myeloid-derived suppressor cells in tumor-bearing mice. *J Immunol* 2008; **181**:5791-5802.
