# Supplementary material
Source: PubMed Central journal article supplement (PMC3587709)
Supplement: cr2012178x8.pdf [file cr2012178x8.pdf]

Supplementary information, Figure S8

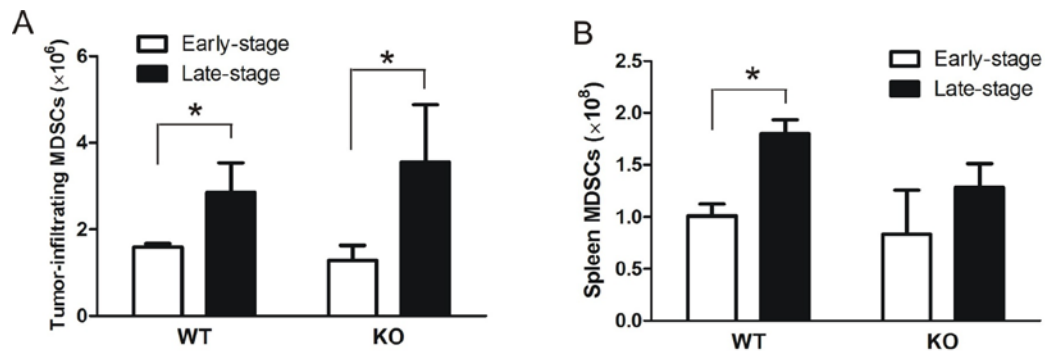

**Figure S8** Measurement of MDSCs in early and late stages of 4T1 tumor growth. 10 days (early stage) and 20 days (late stage) after 4T1 cell inoculation, MDSCs in tumor-infiltrating cells (**A**) and splenocytes (**B**) from WT and KO mice were analyzed by flow cytometry and cell numbers were counted.
