# Supplementary material
Source: PubMed Central journal article supplement (PMC3587709)
Supplement: cr2012178x9.pdf [file cr2012178x9.pdf]

Supplementary information, Figure S9

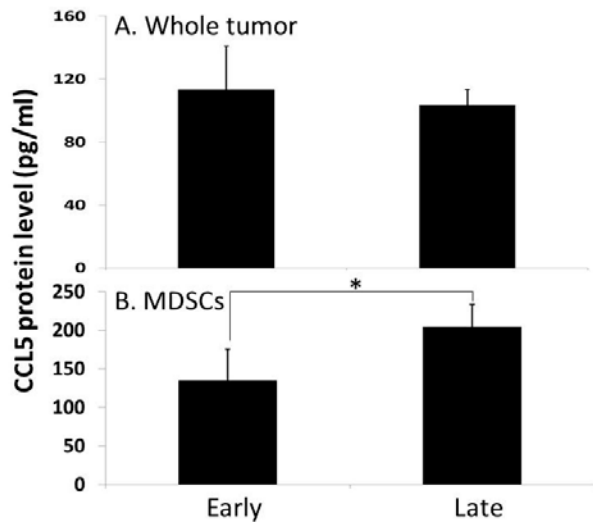

**Figure S9** Measurement of CCL5 protein in early and late stages of 4T1 tumor growth. Mice ( $n = 4$ ) were sacrificed on day 10 (early stage) and day 21 (late stage) after 4T1 inoculation. Total proteins were extracted from whole tumor and tumor-infiltrating MDSCs, normalized to 40 mg/ml for all samples. Samples were appropriately diluted for CCL5 measurement by ELISA. Significant difference was found between early and late stages in MDSCs ( $*P = 0.033105$ ), but not in whole tumors.
