# Supplementary material
Source: PubMed Central journal article supplement (PMC3587709)
Supplement: cr2012178x10.pdf [file cr2012178x10.pdf]

Supplementary information, Figure S10

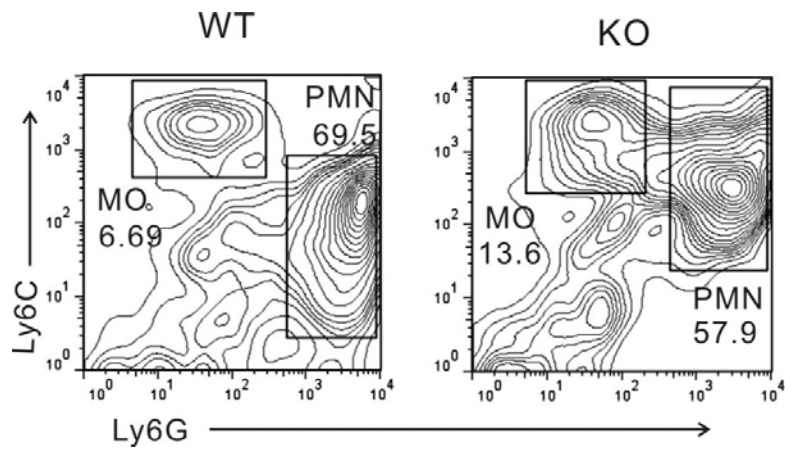

**Figure S10** CD11b<sup>+</sup> cells in spleens of DA3-tumor bearing WT and CCL5 KO mice. MDSCs from DA3-tumor bearing WT and CCL5 KO mice were analyzed by using Ly6G and Ly6C mAbs.
