# Supplementary material
Source: PubMed Central journal article supplement (PMC3587709)
Supplement: cr2012178x11.pdf [file cr2012178x11.pdf]

Supplementary information, Figure S11

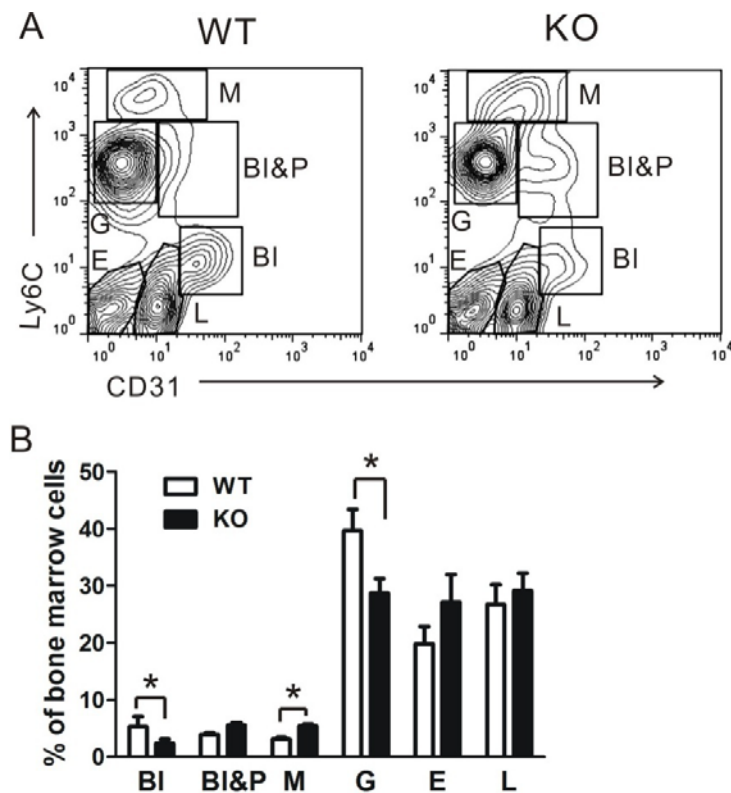

**Figure S11** Bone marrow of tumor-free WT and CCL5 KO mice. **(A)** Whole bone marrow cells were isolated from tumor-free WT and CCL5 KO mice and subjected to flow cytometry analysis using the CD31 and Ly6C mAbs system to distinguish bone marrow subpopulations. B, blasts; P, progenitors; M, monocytes; G, granulocytes; E, erythrocytes and L, lymphocytes. **(B)** Quantity of different subsets in **A**. \* $P < 0.05$ .
