# Supplementary material
Source: PubMed Central journal article supplement (PMC3587709)
Supplement: cr2012178x12.pdf [file cr2012178x12.pdf]

Supplementary information, Figure S12

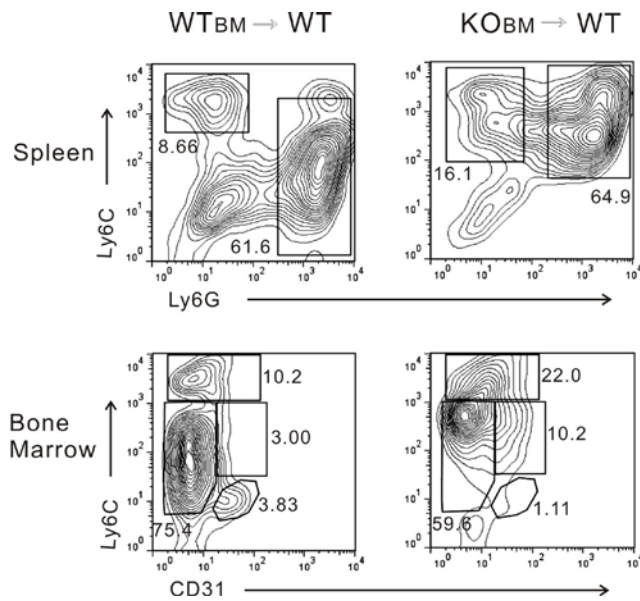

**Figure S12** Reciprocal bone marrow transplantation. Lethally irradiated WT recipient mice (female) were reconstituted with bone marrow from WT or KO donor mice (male). Thirty days after hematopoietic reconstitution, recipient mice were inoculated with 4T1 cells. After two weeks, splenocytes and bone marrow cells from tumor-bearing KO recipient were analyzed by flow cytometry for MDSC phenotypes.  $n = 5$  mice per group.
