# Supplementary material
Source: PubMed Central journal article supplement (PMC3587709)
Supplement: cr2012178x13.pdf [file cr2012178x13.pdf]

Supplementary information, Figure S13

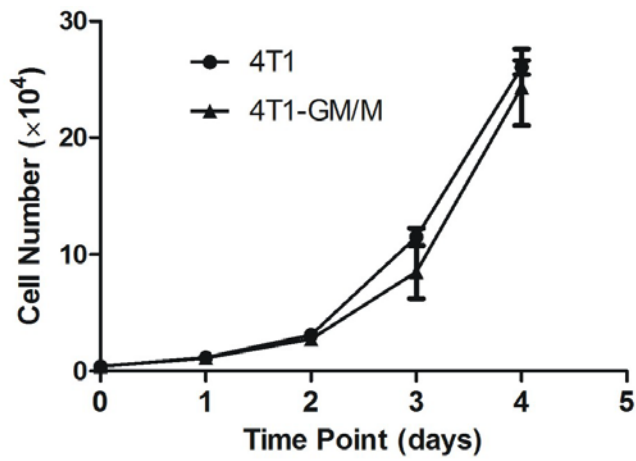

**Figure S13** *In vitro* cell growth of 4T1 and 4T1-GM/M. Cells were plated in 24-well tissue culture plates at a density of  $1.5 \times 10^3$  cells/well. Cells in each treatment group were plated in sextuplicates and cultured for 5 days. Cells were harvested by trypsinization at 24h intervals and stained with 4% trypan blue. Viable cells were counted with a hemocytometer.
