# Supplementary material
Source: PubMed Central journal article supplement (PMC3587709)
Supplement: cr2012178x14.pdf [file cr2012178x14.pdf]

Supplementary information, Table S1

**Table S1** Concentration of GM-CSF, M-CSF and G-CSF in murine serum

|                            | <b>GM-CSF</b><br><b>(pg/ml)</b> | <b>M-CSF</b><br><b>(pg/ml)</b> | <b>G-CSF</b><br><b>(pg/ml)</b> |
|----------------------------|---------------------------------|--------------------------------|--------------------------------|
| Tumor-free <sup>a</sup>    | 2.42±0.01                       | 76.20±8.76                     | 3.07±0.38                      |
| Tumor-bearing <sup>b</sup> | 246.40±38.95                    | 1474.55±102.33                 | 8531.29±143.34                 |

a. 6~8 weeks old female WT mice were chosen.

b. 4T1 tumor cells were injected into the mammary gland of female WT mice. When tumor diameter reached about 15 mm, mice were sacrificed and GM-CSF, M-CSF and G-CSF level in the serum were measured by ELISA. Each group had three mice.
